# Supplementary material for: Simulation study of activities of daily living functions using online computerized adaptive testing
Source: BMC Med Inform Decis Mak. 2016 Oct 10;16:130. doi: 10.1186/s12911-016-0370-8 (PMC5057399; doi:10.1186/s12911-016-0370-8)
Supplement: Additional file 4: — The file layouts of data used for gathering feedback from patients using online CAT. (XLS 58 kb) [file 12911_2016_370_MOESM4_ESM.xls]

## Sheet: reply
repno	replyno	author	type	item1	item2	item3	item4	item5	item6	item7	item8	item9	item10	item11	item12	item13	item14	item15	item16	item17	item18	item19	item20	item21	item22	item23	item24	item25	item26	item27	item28	item29	item30	item31	item32	item33	item34	item35	item36	item37	item38	item39	item40	item41	item42	item43	item44	item45	item46
24	8543	1728570083	cat																					0
24	8541	1417370062	cat											0						0	1
25	8558	1509250751	cat					0	0	0	0	1	0	0		1	0	1	1	0	1	1	0	1	0	1							1	1
25	8539	1328230622	cat	1	0	1	0	0	0	0	0	0	0	1	0	1	0	1	1	0	0	0	1	0	0	1	1	1	1	1	1	1	0	1
25	8538	1212210894	cat				0
25	8537	1207470444	cat																																	0
26	10149	1031010755	cat													1
26	8540	1340070071	cat			0
[truncated: 38 more columns]

## Sheet: items
repno	wav	kno	repna	jpg	authorip	response1	response2	response3	response4	response5	response6	response7	answer	answer1	answer2	answer3	answer4	answer5	answer6	threshold	limit	limit1	limit2	limit3	limit4	limit5	limit6	constant	weight1	weight2	weight3	weight4	weight5	weight6	weight7	mark1	mark2	mark3	mark4	mark5	mark6	mark7
25	quest2/stroke/F01.mp3	01	Washing face	quest2/pic/f1.jpg	211.20.200.82	None	In past 2 days							0	1					1	-1.36	0	0	0	0	0	0
25	quest2/stroke/F02.mp3	02	Brushing teeth	quest2/pic/f2.jpg	211.20.200.82	None	In past 2 days							0	1					1	-1.57	0	0	0	0	0	0
25	quest2/stroke/F03.mp3	03	Climbing stairs(up and down 1 story)	quest2/pic/F.jpg	211.20.200.82	None	In past 2 days							0	1					1	-0.47	0	0	0	0	0	0
25	quest2/stroke/F04.mp3	04	Walking outside(in the neighborhood for >15 min)	quest2/pic/f4.jpg	211.20.200.82	None	In past 2 days							0	1					1	-0.84	0	0	0	0	0	0
25	quest2/stroke/F05.mp3	05	Taking public transportation	quest2/pic/f5.jpg	211.20.200.82	None	In past 2 days							0	1					1	-0.11	0	0	0	0	0	0
25	quest2/stroke/F06.mp3	06	Preparing light meals	quest2/pic/7.jpg	211.20.200.82	None	In past 2 days							0	1					1	0.68	0	0	0	0	0	0
25	quest2/stroke/F07.mp3	07	Preparing ingredients	quest2/pic/f7.jpg	211.20.200.82	None	In past 2 days							0	1					1	1.36	0	0	0	0	0	0
25	quest2/stroke/F08.mp3	08	Washing dishes	quest2/pic/f8.jpg	211.20.200.82	None	In past 2 days							0	1					1	1.19	0	0	0	0	0	0
25	quest2/stroke/F09.mp3	09	Trash disposal	quest2/pic/f9.jpg	211.20.200.82	None	In past 2 days							0	1					1	1.38	0	0	0	0	0	0
25	quest2/stroke/F10.mp3	10	Taking out the trash	quest2/pic/fa.jpg	211.20.200.82	None	In past 2 days							0	1					1	1.5	0	0	0	0	0	0
25	quest2/stroke/F11.mp3	11	Washing clothes	quest2/pic/8.jpg	211.20.200.82	None	in a week							0	1					1	1.23	0	0	0	0	0	0
25	quest2/stroke/F12.mp3	12	Using a telephone	quest2/pic/fc.jpg	211.20.200.82	None	in a week							0	1					1	-0.78	0	0	0	0	0	0
25	quest2/stroke/F13.mp3	13	Social outings	quest2/pic/fd.jpg	211.20.200.82	None	in a week							0	1					1	0.53	0	0	0	0	0	0
25	quest2/stroke/F14.mp3	14	Reading newpapers	quest2/pic/fe.jpg	211.20.200.82	None	in a week							0	1					1	0.48	0	0	0	0	0	0
25	quest2/stroke/F15.mp3	15	Reading books	quest2/pic/2.jpg	211.20.200.82	None	in a week							0	1					1	1.13	0	0	0	0	0	0
25	quest2/stroke/F16.mp3	16	Using a computer	quest2/pic/fg.jpg	211.20.200.82	None	in a week							0	1					1	1.64	0	0	0	0	0	0
25	quest2/stroke/F17.mp3	17	Art activities	quest2/pic/fh.jpg	211.20.200.82	None	in a week							0	1					1	3.3	0	0	0	0	0	0
25	quest2/stroke/F18.mp3	18	Playing chess/cards	quest2/pic/fi.jpg	211.20.200.82	None	in a week							0	1					1	2.62	0	0	0	0	0	0
25	quest2/stroke/F19.mp3	19	Singing karaoke	quest2/pic/fj.jpg	211.20.200.82	None	in a week							0	1					1	2.24	0	0	0	0	0	0
25	quest2/stroke/F20.mp3	20	Going to spa(mainly for hot/cold water treatments)	quest2/pic/fk.jpg	211.20.200.82	None	in a week							0	1					1	2.64	0	0	0	0	0	0
25	quest2/stroke/F21.mp3	21	Withdrawing money	quest2/pic/fl.jpg	211.20.200.82	None	in a week							0	1					1	1.1	0	0	0	0	0	0
25	quest2/stroke/F22.mp3	22	Volunteer work	quest2/pic/fm.jpg	211.20.200.82	None	in a week							0	1					1	3.54	0	0	0	0	0	0
25	quest2/stroke/F23.mp3	23	Gainful work	quest2/pic/3.jpg	211.20.200.82	None	in a week							0	1					1	2.53	0	0	0	0	0	0
25	quest2/stroke/F24.mp3	24	Dringking	quest2/pic/fo.jpg	211.20.200.82	totally dependent	sometimes independent; but not every time	totally independent;every time						0	1	2				2	-1.645	-0.525	0.525	0	0	0	0
25	quest2/stroke/F25.mp3	25	Feeding	quest2/pic/N.jpg	211.20.200.82	totally dependent	sometimes independent; but not every time	totally independent;every time						0	1	2				2	-1.365	-0.585	0.585	0	0	0	0
25	quest2/stroke/F26.mp3	26	Bladder management	quest2/pic/L.jpg	211.20.200.82	totally dependent	sometimes independent; but not every time	totally independent;every time						0	1	2				2	-0.685	-0.325	0.325	0	0	0	0
25	quest2/stroke/F27.mp3	27	Bowel management	quest2/pic/M.jpg	211.20.200.82	totally dependent	sometimes independent; but not every time	totally independent;every time						0	1	2				2	-0.68	-0.44	0.44	0	0	0	0
25	quest2/stroke/F28.mp3	28	Getting up	quest2/pic/fs.jpg	211.20.200.82	totally dependent	sometimes independent; but not every time	totally independent;every time						0	1	2				2	-1.095	-0.505	0.505	0	0	0	0
25	quest2/stroke/F29.mp3	29	Walking inside the house	quest2/pic/ft.jpg	211.20.200.82	totally dependent	sometimes independent; but not every time	totally independent;every time						0	1	2				2	-0.835	-0.475	0.475	0	0	0	0
25	quest2/stroke/F30.mp3	30	Taking medicine on time	quest2/pic/fu.jpg	211.20.200.82	totally dependent	sometimes independent; but not every time	totally independent;every time						0	1	2				2	-0.91	-0.82	0.82	0	0	0	0
25	quest2/stroke/F31.mp3	31	Watching television	quest2/pic/fv.jpg	211.20.200.82	totally dependent	sometimes independent; but not every time	totally independent;every time						0	1	2				2	-1.915	-0.565	0.565	0	0	0	0
25	quest2/stroke/F32.mp3	32	Putting on clothes	quest2/pic/fw.jpg	211.20.200.82	totally dependent	partially dependent	sometimes independent; but not every time	totally independent;every time					0	1	2	3			3	-0.233333	-0.596667	0.203333	0.393333	0	0	0
25	quest2/stroke/F33.mp3	33	Taking off clothes	quest2/pic/fu33.jpg	211.20.200.82	totally dependent	partially dependent	sometimes independent; but not every time	totally independent;every time					0	1	2	3			3	-0.326667	-0.543333	0.176667	0.366667	0	0	0
25	quest2/stroke/F34.mp3	34	Putting on pants/skirts	quest2/pic/fu34.jpg	211.20.200.82	totally dependent	partially dependent	sometimes independent; but not every time	totally independent;every time					0	1	2	3			3	-0.273333	-0.496667	0.153333	0.343333	0	0	0

## Sheet: report
repno	repna	Type	limit	random	fixitems	test_or_not	fix_item	CAT1	CAT2	http	YNanswer	classroom	constant	mse	length	length2	outfit	corr	derivation	mean	sd	active
25	Online CAT for Male ADL scale	cat	25	0	25	0				0				0.48	10	0	20	0.1

## Sheet: homepage
				Worksheets	Data stucture
				1.report	To show the subject of a course
				2.items	To show the item properties
				3. reply	To show the reply of finished items gathered from a patient
